# Supplementary material
Source: Research Square preprint supplement (doi:10.21203/rs.3.rs-9026883/v1)
Supplement: Supplementary file 1 [file 716ebb7b24bb60490665a725.docx]

Table 1. Patients demographics

|  | ICL | PRK | *P*a |
| --- | --- | --- | --- |
| Patients, eyes (N) | 17, 30 | 14, 24 | N/A |
| Age (years), mean ± SD (range) | 34.90 ± 5.08  (25 to 45) | 36.42 ± 4.84  (29 to 49) | 0.271 |
| Sex (M/F) | 12/18 | 12/12 | 0.646 |
| Laterality (R/L) | 17/13 | 14/10 | 0.991 |
| UDVA (logMAR), mean ± SD (range) | 0.55 ± 0.26  (0.15 to 1.00) | 0.58 ± 0.25  (0.30 to 1.00) | 0.612 |
| CDVA (logMAR), mean ± SD (range) | -0.10 ± 0.04  (-0.18 to -0.08) | -0.09 ± 0.04  (-0.18 to 0.00) | 0.468 |
| Sphere (D), mean ± SD (range) | -1.93 ± 0.66  (-3.25 to -0.75) | -2.34 ± 0.92  (-4.25 to -0.75) | 0.067 |
| Cylinder (D), mean ± SD (range) | -0.52 ± 0.41  (-1.50 to 0.00) | -0.52 ± 0.43  (-1.75 to 0.00) | 0.971 |
| SE (D), mean ± SD (range) | -2.18 ± 0.61  (-3.5 to -1.38) | -2.60 ± 0.97  (-4.38 to -1.00) | 0.072 |
| Type of previous LVC (LASIK/PRK) | 13/17 | 15/9 | 0.260 |

ICL = implantable collamer lens; PRK = photorefractive keratectomy; N = number; N/A = non-applicable; SD = standard deviation; M/F = male/female; R/L = right/left; UDVA = uncorrected distance visual acuity; logMAR = logarithm of the minimum angle of resolution; CDVA = corrected distance visual acuity; D = diopters; SE = spherical equivalent; LVC = laser vision correction; LASIK = laser in situ keratomileusis.

aInter-group difference by an independent sample t-test or Mann–Whitney U test.

Table 2. Postoperative visual and refractive outcomes.

|  | ICL | PRK | *P* a |
| --- | --- | --- | --- |
| UDVA (logMAR), mean ± SD (range)  1 week  1 month  3 months  6 months  *P* b | -0.06 ± 0.06  (-0.18 to 0.15)  -0.08 ± 0.06  (-0.18 to 0.00)  -0.08 ± 0.04  (-0.18 to 0.00)  -0.08 ± 0.05  (-0.18 to 0.00)  0.095 | 0.07 ± 0.12  (-0.08 to 0.53)  -0.02 ± 0.08  (-0.08 to 0.22)  -0.06 ± 0.06  (-0.18 to 0.05)  -0.06 ± 0.06  (-0.18 to -0.10)  <0.001 | <0.001  0.005  0.108  0.214 |
| CDVA (logMAR), mean ± SD (range)  1 week  1 month  3 months  6 months  *P* b | -0.08 ± 0.04  (-0.18 to 0.15)  -0.10 ± 0.04  (-0.18 to 0.00)  -0.10 ± 0.05  (-0.18 to 0.00)  -0.10 ± 0.04  (-0.18 to 0.00)  0.918 | 0.01 ± 0.09  (-0.08 to 0.15)  -0.06 ± 0.05  (-0.18 to 0.10)  -0.08 ± 0.05  (-0.18 to 0.05)  -0.08 ± 0.05  (-0.18 to 0.00)  0.010 | <0.001  0.171  0.488  0.521 |
| Sphere (D), mean ± SD (range)  1 week  1 month  3 months  6 months  *P* b | -0.28 ± 0.38  (-0.75 to 0.75)  -0.31 ± 0.36  (-0.75 to 0.50)  -0.30 ± 0.38  (-1.00 to 0.50)  -0.28 ± 0.31  (-0.75 to 0.25)  0.973 | -0.03 ± 0.96  (-1.75 to 1.75)  -0.29 ± 0.74  (-1.25 to 1.00)  -0.22 ± 0.42  (-1.25 to 1.00)  -0.21 ± 0.45  (-1.00 to 1.00)  0.038 | 0.208  0.914  0.804  0.830 |
| Cylinder (D), mean ± SD (range)  1 week  1 month  3 months  6 months  *P* b | -0.41 ± 0.31  (-1.25 to 0.00)  -0.28 ± 0.21  (-0.75 to 0.00)  -0.39 ± 0.23  (-0.75 to 0.00)  -0.34 ± 0.23  (-0.75 to 0.00)  0.092 | -0.41 ± 0.34  (-1.25 to 0.00)  -0.36 ± 0.31  (-1.25 to 0.00)  -0.35 ± 0.31  (-1.25 to 0.00)  -0.33 ± 0.34  (-1.50 to 0.00)  0.753 | 0.981  0.216  0.237  0.979 |
| SE (D), mean ± SD (range)  1 week  1 month  3 months  6 months  *P* b | -0.48 ± 0.33  (-1.00 to 0.38)  -0.45 ± 0.36  (-1.00 to 0.38)  -0.50 ± 0.38  (-1.13 to 0.50)  -0.45 ± 0.29  (-0.88 to 0.25)  0.925 | -0.23 ± 1.03  (-2.38 to 1.63)  -0.47 ± 0.73  (-2.00 to 0.63)  -0.44 ± 0.44  (-1.50 to 0.63)  -0.38 ± 0.47  (-1.38 to 0.88)  0.040 | 0.225  0.853  0.513  0.490 |

ICL = implantable collamer lens; PRK = photorefractive keratectomy; UDVA = uncorrected distance visual acuity; logMAR = logarithm of the minimum angle of resolution; CDVA = corrected distance visual acuity; D = diopters; SE = spherical equivalent.

aInter-group difference by independent sample t test or Mann–Whitney U test.

bChanges over time by repeated-measures analysis of variance test.

Table 3. Vector analysis

|  | ICL | PRK | *P* a |
| --- | --- | --- | --- |
| TIA (D), mean ± SD (range) | 0.52 ± 0.41  (0.00 to 1.50) | 0.48 ± 0.46  (0.00 to 1.75) | 0.756 |
| SIA (D), mean ± SD (range) | 0.45 ± 0.31  (0.10 to 1.35) | 0.64 ± 0.47  (0.00 to 2.14) | 0.045 |
| DV (D), mean ± SD (range) | 0.30 ± 0.24  (0.18 to 0.75) | 0.31 ± 0.36  (0.00 to 1.50) | 0.878 |
| CI, mean ± SD (range) | 0.80 ± 0.45  (0.21 to 1.99) | 1.09 ± 0.55  (0.28 to 2.36) | 0.072 |
| IOS, mean ± SD (range) | 0.47 ± 0.40  (0.00 to 1.00) | 0.45 ± 0.54  (0.00 to 1.50) | 0.533 |
| ME (D), mean ± SD (range) | -0.07 ± 0.31  (-0.59 to 0.50) | 0.16 ± 0.41  (-0.48 to 0.99) | 0.022 |
| lMEl (D), mean ± SD (range) | 0.25 ± 0.19  (0.00 to 0.59) | 0.31 ± 0.31  (0.00 to 0.99) | 0.896 |
| AE (°), mean ± SD (range) | 16.87 ± 69.14  (-167.73 to 173.08) | 27.84 ± 56.52  (-34.00 to 160.00) | 0.282 |

ICL = implantable collamer lens; PRK = photorefractive keratectomy; TIA = target induced astigmatism; SIA = surgically induced astigmatism; DV = different vector; CI = correction index; IOS = index of success; ME = magnitude of error; AE = angle of error

aInter-group difference by independent sample t test or Mann–Whitney U test.
